# Supplementary material for: Dittmarite precursors for structure and morphology directed synthesis of lithium manganese phospho-olivine nanostructures
Source: Royal Society of Chemistry journal article supplement (doi:10.1039/c3ce42501k), 2014-06-17
Supplement: c3ce42501k1.pdf [file c3ce42501k1.pdf]

SUPPORTING INFORMATION (ESI)

## Dittmarite Precursors for Structure and Morphology Directed Synthesis of Lithium Manganese Phospho-Olivine Nanostructures

Violeta Koleva,<sup>\*a</sup> Radostina Stoyanova,<sup>a</sup> Ekaterina Zhecheva<sup>a</sup> and Diana Nihtianova<sup>a,b</sup>

S1. Electrochemical characterization of  $\text{LiMnPO}_4$  obtained from  $\text{NH}_4\text{MnPO}_4 \cdot \text{H}_2\text{O}$  as a precursor

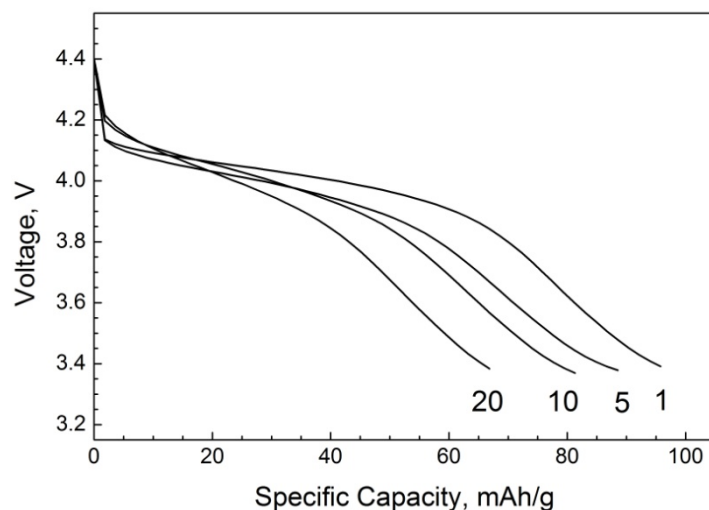

Fig. S1 Discharge curves for the 1<sup>st</sup>, 5<sup>th</sup>, 10<sup>th</sup> and 20<sup>th</sup> cycle at C/50 rate of  $\text{LiMnPO}_4$  obtained from the ammonium precursor (sample N-LMP)
